# Supplementary material for: Topotecan or other agents as second-line therapy for relapsed small-cell lung cancer: A meta-analysis of randomized studies
Source: PubMed Central journal article supplement — Mol Clin Oncol. 2021 Aug 25;15(4):218. doi: 10.3892/mco.2021.2383 (PMC8408676; doi:10.3892/mco.2021.2383), 2021-08-25

Figure S1. Forest plot for overall response rate of topotecan vs. other agents. M-H, Mantel Haenszel; df, degree of freedom; 95% CI, 95% confidence interval.

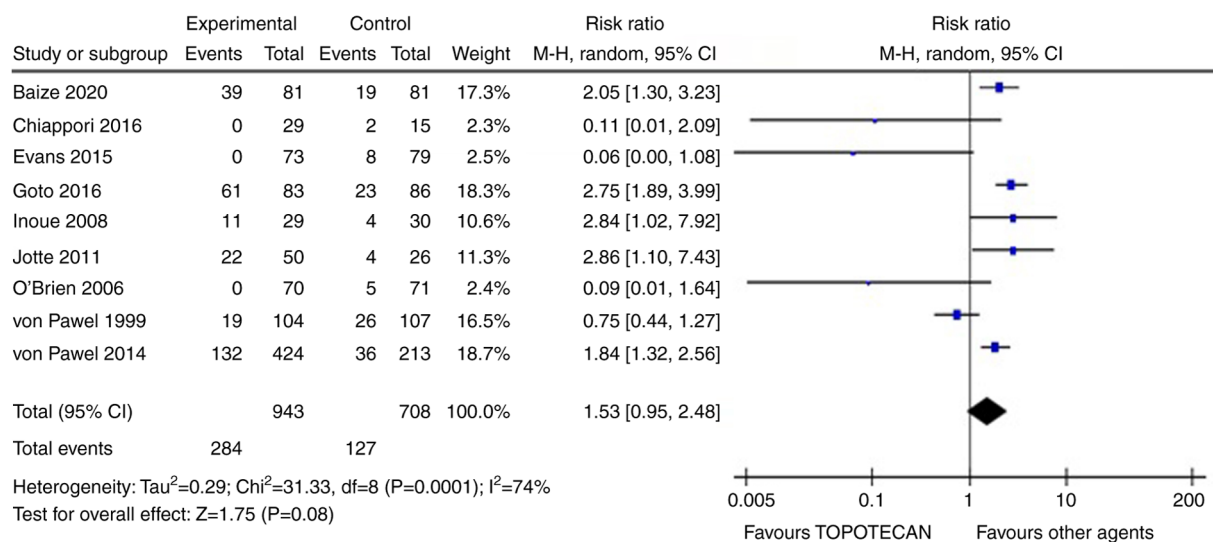

Figure S2. Forest plot for G3-4 anemia rate of topotecan vs. other agents. M-H, Mantel Haenszel; df, degree of freedom; 95% CI, 95% confidence interval.

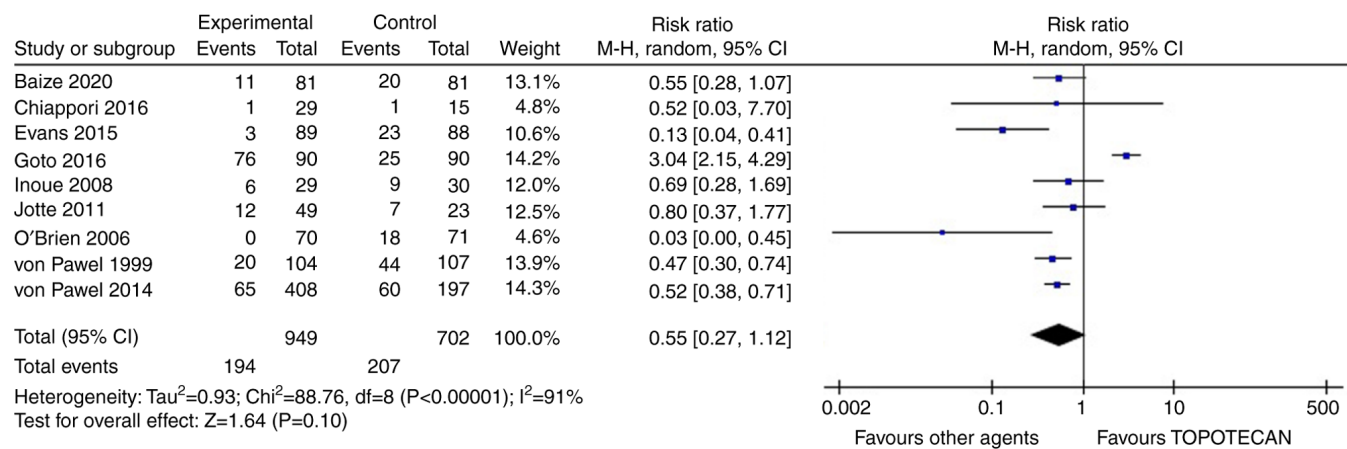

Figure S3. Forest plot for febrile neutropenia rate of topotecan vs. other agents. M-H, Mantel Haenszel; df, degree of freedom; 95% CI, 95% confidence interval.

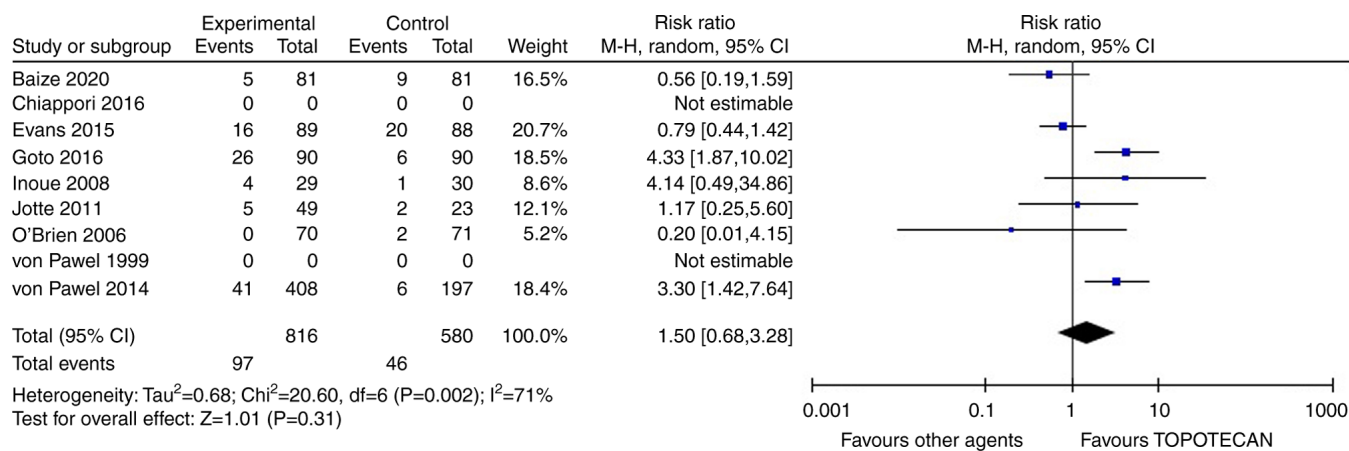

Figure S4. Forest plot for G3-4 neutropenia rate of topotecan vs. other agents. M-H, Mantel Haenszel; df, degree of freedom; 95% CI, 95% confidence interval.

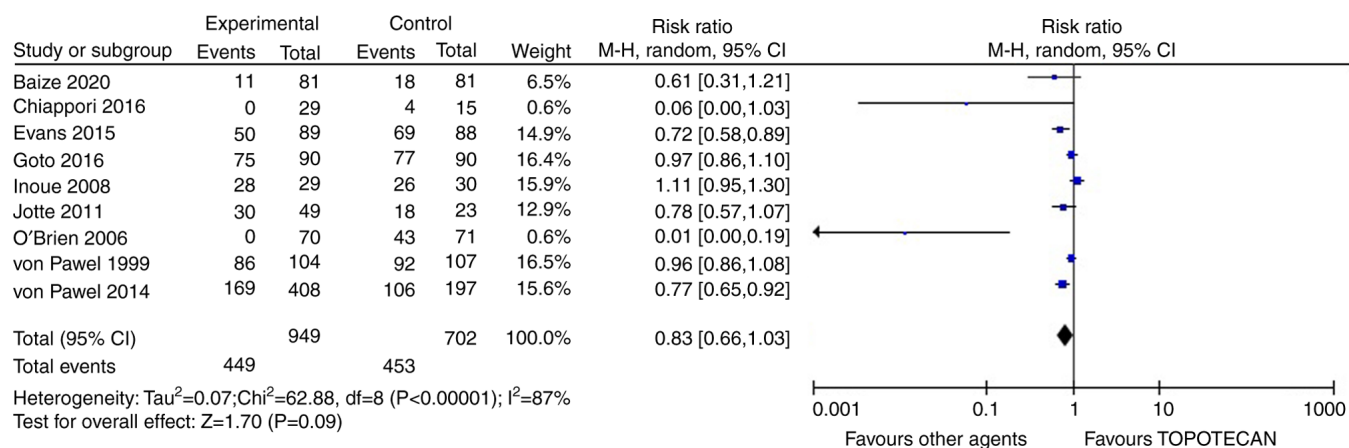

Figure S5. Forest plot for G3-4 thrombocytopenia rate of topotecan vs. other agents. M-H, Mantel Haenszel; df, degree of freedom; 95% CI, 95% confidence interval.

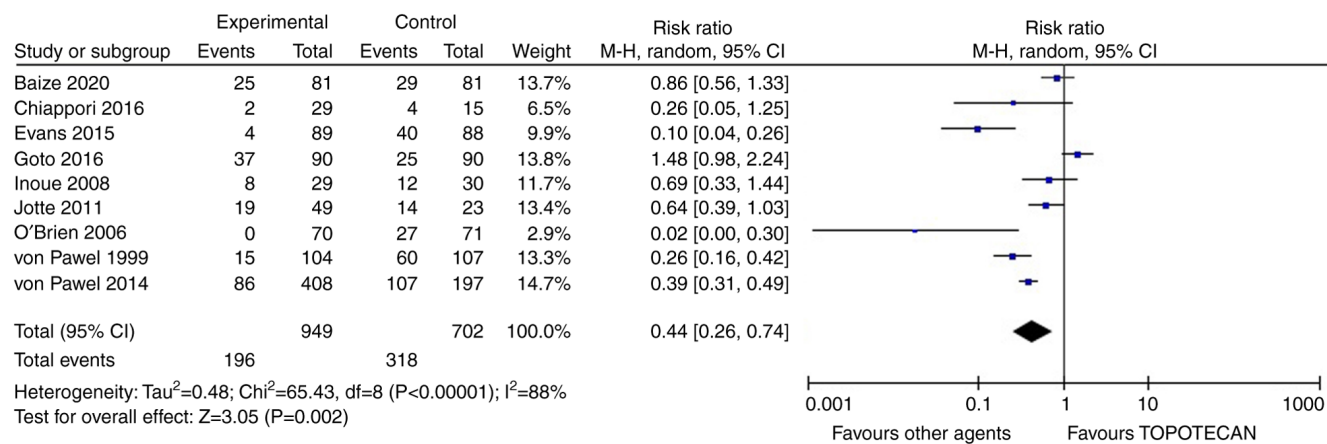

Supplement: Supplementary_Data.pdf [file Supplementary_Data.pdf]
